# Supplementary material
Source: Research Square preprint supplement (doi:10.21203/rs.3.rs-9145978/v1)
Supplement: Supplementary file 1 [file 52cafc6610b187948a62e535.docx]

**Distinct Prosocial Behaviors Associated with Persistent Symptom Trajectories in Psychiatric Disorders**

Supplementary Information

Table of Contents

[Supplementary Methods 3](#_Toc224554500)

[Dataset and recruitment procedure 3](#_Toc224554501)

[Previous Psychiatric Diagnosis 3](#_Toc224554502)

[Longitudinal analyses (confounders, longitudinal analyses, multiple testing) 4](#_Toc224554503)

[The Prosocial Tendencies Measure 5](#_Toc224554504)

[COVID-19-Related Measures 7](#_Toc224554505)

[Internal consistency of the Prosocial Tendencies Measure 8](#_Toc224554506)

[Internal consistency for the Psychiatric Symptom Measures 9](#_Toc224554507)

[Supplementary Results 10](#_Toc224554508)

[Demographics 10](#_Toc224554509)

[Baseline analyses: Main models 11](#_Toc224554510)

[Baseline analyses: Extended models 13](#_Toc224554511)

[Baseline analyses: Effect sizes 15](#_Toc224554512)

[Baseline analyses: Exploratory models (ADHD; OCD; PTSD; Gambling) 20](#_Toc224554513)

[Longitudinal analyses: Main models 24](#_Toc224554514)

[Longitudinal analyses: Extended models 29](#_Toc224554515)

[Longitudinal analyses: Trajectory Characteristics 33](#_Toc224554516)

[Supplementary References 37](#_Toc224554517)

# Supplementary Methods

## Dataset and recruitment procedure

For details on the dataset and recruitment procedures, see 1**.**

## Previous Psychiatric Diagnosis

Lifetime psychiatric diagnoses from a mental healthcare setting were assessed at baseline by asking the participant to confirm a specific disorder from a pre-defined list following the categorization in the fifth version of the Diagnostic Statistical Manual of Mental Disorders 2. For alcohol and substance use disorders, this was a single item. Anxiety disorders were operationalized by responding positively to any of the following categories: agoraphobia, generalized anxiety, health anxiety, panic disorder, posttraumatic stress, social anxiety, and specific phobia. Depressive disorders were operationalized by responding positively to either major depression or postpartum depression. For additional details, see main study: 1.

## Longitudinal analyses (confounders, longitudinal analyses, multiple testing)

Here we investigated whether prosocial behavior at baseline could predict differences in subsequent psychiatric symptom load trajectories.

Given that psychiatric symptom trajectories are heterogeneous and non-linear, we conducted **latent class linear mixed models** implemented using the R package lcmm 3 to classify individuals into latent classes based on differences in the development of psychiatric symptom load over time (e.g., low vs high symptom load).

One latent class mixed-effects model was estimated per psychiatric measure, varying in the number of latent classes included. New classes were added iteratively, and the final model for each outcome was selected such that each class comprised at least 10% of the sample.

In other words, models in which one class included less than 10% of participants were not considered, and no additional classes were added. The final model selection was based on the Bayesian Information Criterion.

Following the classification of individuals into different classes for each psychiatric domain, we applied a logistic regression model using the classification variable as a dependent variable and adding the six prosocial subtypes and demographic variables (age, gender, education) as independent variables. All models adjusted for shared variance with trajectory class membership in the remaining psychiatric symptom domains.

*Multiple testing*

Given the number of outcomes and predictors examined, we considered the issue of multiple testing. Formal adjustment for multiple comparisons (e.g., Bonferroni correction) was not applied to the primary analyses, as all prosocial subtypes and psychiatric symptom domains were entered simultaneously within multivariable models based on a priori theoretical hypotheses.

This approach reduces the risk of spurious findings by estimating the unique association of each prosocial subtype and each psychiatric symptoms while controlling for the others. I

## The Prosocial Tendencies Measure

Subscale definitions:

The Prosocial Tendencies Model is based on behavioral observations of different helping opportunities and proposed six subtypes of context-dependent prosocial behaviors:

- altruistic (helping without the expectation for self-rewards),

- anonymous (helping without revealing one’s identity),

- compliant (helping upon request),

- dire (helping during emergency situations),

- emotional (helping in affectively arousing situations), and

- public (helping in front of others).

The Prosocial Tendencies Measure, instructions and items per subscale:

Altruistic prosocial behavior (reversely coded)

- I think that one of the best things about helping others is that it makes me look good.

- I believe that donating goods or money works best when it is tax-deductible.

- I think there should be more recognition for the time and energy people spend on charity work.

- One of the best things about doing charity work is that it looks good on my resume.

- I feel that if I help someone, they should help me in the future.

Anonymous prosocial behavior

- I prefer to donate money anonymously.

- I tend to help needy others most when they do not know who helped them.

- Most of the time, I help others when they do not know who helped them.

- I think that helping others without them knowing is the best type of situation.

- I often make anonymous donations because they make me feel good.

Compliant prosocial behavior

- When people ask me to help them, I don't hesitate.

- I never hesitate to help others when they ask for it.

Dire prosocial behavior

- I tend to help people who are in a real crisis or need.

- I tend to help people who hurt themselves badly.

- It is easy for me to help others when they are in a dire situation.

Emotional prosocial behavior

- It is most fulfilling to me when I can comfort someone who is very distressed.

- I tend to help others particularly when they are emotionally distressed.

- I respond to helping others best when the situation is highly emotional.

- Emotional situations make me want to help needy others.

Public prosocial behavior

- I can help others best when people are watching me.

- When other people are around, it is easier for me to help needy others.

- I get the most out of helping others when it is done in front of others.

- Helping others when I am in the spotlight is when I work best.

Responses were rated on a 1-5 Likert scale:

*Below are a number of statements which may or may not describe you.*

*Please indicate HOW MUCH EACH STATEMENT DESCRIBES YOU by using the scale below:*

*1 DOES NOT DESCRIBES AT ALL*

*2 DESCRIBES ME A LITTLE*

*3 SOMEWHAT DESCRIBES ME*

*4 DESCRIBES ME WELL*

*5 DESCRIBE ME GREATLY*

## COVID-19-Related Measures

**COVID-19 Infection.**

Given the timing of our data collection, we controlled for the severity of a potential COVID-19 infection in all our analyses. We used a self-made questionnaire (ranging from 0 to 3 points) to assess the potential symptom severity of a COVID-19 infection.

*Have you had confirmed COVID-19, and if so, indicate the severity?*

- *No*
- *Yes, I have had symptoms and stayed at home.*
- *Yes, I have been on sick leave due to COVID-19.*
- *Yes, I have needed hospital care.*

**Subjective Loneliness.**

Next, given that the pandemic imposed general restrictions on social interaction, we controlled for subjective loneliness using the 3-item UCLA Loneliness Scale, ranging from 1 (Rarely) to 2 (Always) (ref):

*The following statements describe how people sometimes feel. For each statement, please indicate how often you feel the way described*

- *How often do you feel that you are “in tune” with the people around you?*
- *How often do you feel that no one really knows you well?*
- *How often do you feel you can find companionship when you want it?*
- *How often do you feel that people are around you but not with you?*

## Internal consistency of the Prosocial Tendencies Measure

The subscales of the prosocial tendencies measure (PTM) have demonstrated adequate internal consistency, test-retest reliability, and convergent validity in previous studies 4, and demonstrate acceptable to good reliability in our study, in accordance with below:

| **Supplementary Table S1.** Internal consistence for PTM | | |
| --- | --- | --- |
| **Subscale** | **Number of Items** | **Cronbach's Alpha** |
| Altruistic Prosocial Behavior | 5 | 0.6307678 |
| Compliant Prosocial Behavior | 2 | 0.838859 |
| Dire Prosocial Behavior | 3 | 0.7922564 |
| Emotional Prosocial Behavior | 4 | 0.6910425 |
| Anonymous Prosocial Behavior | 5 | 0.7788728 |
| Public Prosocial Behavior | 4 | 0.7173894 |

## Internal consistency for the Psychiatric Symptom Measures

The scales on psychiatric symptom load demonstrate good to excellent reliability in accordance with below:

| **Supplementary Table S2.** Internal consistence for the psychiatric symptom measures | | |
| --- | --- | --- |
| **Measure** | **Number of Items** | **Cronbach's Alpha** |
| AUDIT (Alcohol use) | 10 | 0.9054329 |
| DUDIT (Drug use) | 11 | 0.9288094 |
| GAD-7 (Anxiety symptoms) | 7 | 0.9040281 |
| PHQ-9 (Depressive symptoms) | 9 | 0.8822395 |
|  |  |  |
| BAARS-IV (ADHD symptoms) | 18 | 0.907144 |
| OCIR (OCD symptoms) | 18 | 0.8795631 |
| PCL-5 (PTSD) | 21 | 0.9514198 |
| PGSI (Gambling) | 9 | 0.9517733 |
| **Note:** Cronbach’s α values reflect internal consistency in the current study sample. For the PCL-5, internal consistency was estimated among participants endorsing trauma exposure.  **Abbreviations:** AUDIT = Alcohol Use Disorders Identification Test; DUDIT = Drug Use Disorders Identification Test; GAD-7 = Generalized Anxiety Disorder–7; PHQ-9 = Patient Health Questionnaire–9; BAARS-IV = Barkley Adult ADHD Rating Scale–IV; OCI-R = Obsessive–Compulsive Inventory–Revised; PCL-5 = PTSD Checklist for DSM-5; PGSI = Problem Gambling Severity Index. | | |

# Supplementary Results

## Demographics

Bivariate correlations indicated small-to-moderate relationships among the six prosocial subtypes (Pearson *r* = .05 to .63; see Supplementary Figure S1).

**Supplementary Figure S1.** Correlations between psychiatric symptoms and subtypes of prosocial behavior at baseline. Values in each cell display the Pearson r coefficients.

**Abbreviations:** PB = Prosocial Behavior


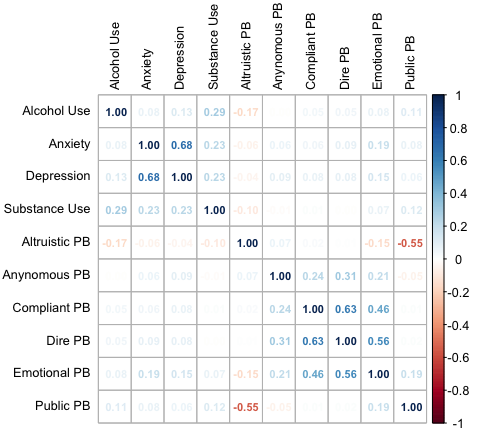


## Baseline analyses: Main models

We created four multiple linear regression models, each including all six prosocial subtypes, as well as age, gender and education as independent variables, and for each model, one of the psychiatric scales as a dependent variable, while controlling for the remaining psychiatric symptom scales as independent variables. To simplify the interpretation of the results, we excluded data on gender where the participants not identified as male or female gender (n=231).

*Generic linear regression model specification:*

*psychScale1 ~ ptmAnynomousZ + ptmCompliantZ+ ptmDireZ+ ptmAltruismZ+ ptmEmotionZ+ ptmPublicZ + psychScale2Z + psychScale3Z + psychScale4Z + ageZ + education + gender*

| **Supplementary Table S3.** Baseline Alcohol use-demographics model | | | | |
| --- | --- | --- | --- | --- |
|  | Estimate | Std. Error | t value | Pr(>|t|) |
| (Intercept) | 9.85823 | 0.46174 | 21.350 | < 2e-16*** |
| ptmAltruismZ | -0.32552 | 0.10614 | -3.067 | 0.00218** |
| ptmAnynomousZ | -0.21201 | 0.09312 | -2.277 | 0.02285* |
| ptmCompliantZ | 0.15496 | 0.11497 | 1.348 | 0.17781 |
| ptmDireZ | 0.18883 | 0.12686 | 1.489 | 0.13669 |
| ptmEmotionZ | 0.08492 | 0.11484 | 0.739 | 0.45966 |
| ptmPublicZ | 0.07713 | 0.10585 | 0.729 | 0.46625 |
| DUDITZ | 1.26924 | 0.09001 | 14.102 | < 2e-16*** |
| GAD7Z | -0.29686 | 0.12064 | -2.461 | 0.01391* |
| PHQ9Z | 0.01738 | 0.12016 | 0.145 | 0.88498 |
| ageZ | -0.44313 | 0.09217 | -4.808 | 1.58e-06*** |
| education | 0.36159 | 0.18364 | 1.969 | 0.04901* |
| gender | -1.45088 | 0.21013 | -6.905 | 5.78e-12*** |
| Residual standard error: 5.697 on 4240 degrees of freedom  (231 observations deleted due to missingness)  Multiple R-squared: 0.0809, Adjusted R-squared: 0.0783  F-statistic: 31.1 on 12 and 4240 DF, p-value: < 2.2e-16 | | | | |

| **Supplementary Table S4.** Baseline Substance use-demographics model | | | | |
| --- | --- | --- | --- | --- |
|  | Estimate | Std. Error | t value | Pr(>|t|) | |
| (Intercept) | 4.64237 | 0.33642 | 13.799 | < 2e-16*** | |
| ptmAltruismZ | -0.04285 | 0.07805 | -0.549 | 0.5831 | |
| ptmAnynomousZ | -0.01369 | 0.06844 | -0.200 | 0.8414 | |
| ptmCompliantZ | -0.15787 | 0.08444 | -1.870 | 0.0616. | |
| ptmDireZ | 0.06233 | 0.09320 | 0.669 | 0.5037 | |
| ptmEmotionZ | 0.20987 | 0.08430 | 2.489 | 0.0128* | |
| ptmPublicZ | 0.13153 | 0.07773 | 1.692 | 0.0907. | |
| AUDITZ | 0.92108 | 0.06532 | 14.102 | < 2e-16*** | |
| GAD7Z | 0.11861 | 0.08867 | 1.338 | 0.1811 | |
| PHQ9Z | 0.45025 | 0.08800 | 5.117 | 3.25e-07*** | |
| ageZ | -0.14182 | 0.06785 | -2.090 | 0.0367* | |
| education | -0.66254 | 0.13457 | -4.923 | 8.84e-07*** | |
| gender | -1.22808 | 0.15407 | -7.971 | 2.01e-15*** | |
| Residual standard error: 4.185 on 4240 degrees of freedom  (231 observations deleted due to missingness)  Multiple R-squared: 0.1015, Adjusted R-squared: 0.099  F-statistic: 39.93 on 12 and 4240 DF, p-value: < 2.2e-16 | | | | | |

| **Supplementary Table S5.** Baseline Anxiety-demographics model | | | | |
| --- | --- | --- | --- | --- |
|  | Estimate | Std. Error | t value | Pr(>|t|) |
| (Intercept) | 10.31234 | 0.33435 | 30.843 | < 2e-16*** |
| ptmAltruismZ | -0.04291 | 0.07698 | -0.557 | 0.57734 |
| ptmAnynomousZ | -0.05609 | 0.06751 | -0.831 | 0.40611 |
| ptmCompliantZ | -0.22659 | 0.08325 | -2.722 | 0.00652** |
| ptmDireZ | 0.05509 | 0.09194 | 0.599 | 0.54904 |
| ptmEmotionZ | 0.51936 | 0.08283 | 6.270 | 3.97e-10*** |
| ptmPublicZ | 0.10934 | 0.07668 | 1.426 | 0.15397 |
| AUDITZ | -0.16209 | 0.06587 | -2.461 | 0.01391* |
| DUDITZ | 0.08924 | 0.06671 | 1.338 | 0.18106 |
| PHQ9Z | 3.72231 | 0.06567 | 56.680 | < 2e-16*** |
| ageZ | -0.37956 | 0.06671 | -5.690 | 1.36e-08*** |
| education | 0.13362 | 0.13311 | 1.004 | 0.31551 |
| gender | 0.82875 | 0.15258 | 5.432 | 5.90e-08*** |
| Residual standard error: 4.128 on 4240 degrees of freedom  (231 observations deleted due to missingness)  Multiple R-squared: 0.4763, Adjusted R-squared: 0.4748  F-statistic: 321.4 on 12 and 4240 DF, p-value: < 2.2e-16 | | | | |

| **Supplementary Table S6.** Baseline Depression-demographics model | | | | |
| --- | --- | --- | --- | --- |
|  | Estimate | Std. Error | t value | Pr(>|t|) | |
| (Intercept) | 18.00407 | 0.39191 | 45.940 | < 2e-16*** | |
| ptmAltruismZ | -0.01864 | 0.09048 | -0.206 | 0.8368 | |
| ptmAnynomousZ | 0.35634 | 0.07915 | 4.502 | 6.92e-06*** | |
| ptmCompliantZ | 0.21213 | 0.09787 | 2.167 | 0.0303* | |
| ptmDireZ | -0.00884 | 0.10805 | -0.082 | 0.9348 | |
| ptmEmotionZ | -0.08404 | 0.09779 | -0.859 | 0.3902 | |
| ptmPublicZ | 0.02267 | 0.09014 | 0.251 | 0.8015 | |
| AUDITZ | 0.01121 | 0.07747 | 0.145 | 0.8850 | |
| DUDITZ | 0.40001 | 0.07818 | 5.117 | 3.25e-07*** | |
| GAD7Z | 4.39515 | 0.07754 | 56.680 | < 2e-16*** | |
| ageZ | 0.10176 | 0.07868 | 1.293 | 0.1960 | |
| education | -1.32485 | 0.15512 | -8.541 | < 2e-16*** | |
| gender | -0.37698 | 0.17985 | -2.096 | 0.0361* | |
| Residual standard error: 4.851 on 4240 degrees of freedom  (231 observations deleted due to missingness)  Multiple R-squared: 0.4744, Adjusted R-squared: 0.4729  F-statistic: 319 on 12 and 4240 DF, p-value: < 2.2e-16 | | | | | |

## Baseline analyses: Extended models

**Controlling for COVID-19-related variables: COVID-19 infection and subjective loneliness.**

| **Supplementary Table S7.** Baseline Alcohol use-COVID model | | | | |
| --- | --- | --- | --- | --- |
|  | Estimate | Std. Error | t value | Pr(>|t|) |
| (Intercept) | 9.92953 | 0.46292 | 21.450 | < 2e-16*** |
| ptmAltruismZ | -0.32329 | 0.10613 | -3.046 | 0.00233** |
| ptmAnynomousZ | -0.20819 | 0.09319 | -2.234 | 0.02553* |
| ptmCompliantZ | 0.15776 | 0.11495 | 1.372 | 0.17001 |
| ptmDireZ | 0.17573 | 0.12738 | 1.380 | 0.16778 |
| ptmEmotionZ | 0.09094 | 0.11487 | 0.792 | 0.42859 |
| ptmPublicZ | 0.08114 | 0.10585 | 0.767 | 0.44338 |
| DUDITZ | 1.26841 | 0.09000 | 14.093 | < 2e-16*** |
| GAD7Z | -0.28194 | 0.12121 | -2.326 | 0.02006* |
| PHQ9Z | 0.09572 | 0.12823 | 0.746 | 0.45542 |
| ageZ | -0.43015 | 0.09239 | -4.656 | 3.32e-06*** |
| education | 0.36112 | 0.18378 | 1.965 | 0.04949* |
| gender | -1.49126 | 0.21116 | -7.062 | 1.91e-12*** |
| lonelinessZ | -0.16274 | 0.10210 | -1.594 | 0.11105 |
| covidInfectZ | -0.11772 | 0.08704 | -1.352 | 0.17630 |
| Residual standard error: 5.695 on 4238 degrees of freedom  (231 observations deleted due to missingness)  Multiple R-squared: 0.08182, Adjusted R-squared: 0.07879  F-statistic: 26.98 on 14 and 4238 DF, p-value: < 2.2e-16 | | | | |

| **Supplementary Table S8.** Baseline Substance use-COVID model | | | | |
| --- | --- | --- | --- | --- |
|  | Estimate | Std. Error | t value | Pr(>|t|) |
| (Intercept) | 4.63476 | 0.33747 | 13.734 | < 2e-16*** |
| ptmAltruismZ | -0.04461 | 0.07806 | -0.571 | 0.5677 |
| ptmAnynomousZ | -0.01023 | 0.06852 | -0.149 | 0.8813 |
| ptmCompliantZ | -0.15790 | 0.08445 | -1.870 | 0.0616. |
| ptmDireZ | 0.05345 | 0.09361 | 0.571 | 0.5680 |
| ptmEmotionZ | 0.21149 | 0.08435 | 2.507 | 0.0122* |
| ptmPublicZ | 0.12961 | 0.07776 | 1.667 | 0.0956. |
| AUDITZ | 0.92103 | 0.06535 | 14.093 | < 2e-16*** |
| GAD7Z | 0.12688 | 0.08910 | 1.424 | 0.1545 |
| PHQ9Z | 0.46840 | 0.09396 | 4.985 | 6.43e-07*** |
| ageZ | -0.14026 | 0.06803 | -2.062 | 0.0393* |
| education | -0.67025 | 0.13471 | -4.975 | 6.77e-07*** |
| gender | -1.21728 | 0.15495 | -7.856 | 4.99e-15*** |
| lonelinessZ | -0.05263 | 0.07504 | -0.701 | 0.4832 |
| covidInfectZ | 0.06860 | 0.06396 | 1.072 | 0.2836 |
| Residual standard error: 4.185 on 4238 degrees of freedom  (231 observations deleted due to missingness)  Multiple R-squared: 0.1019, Adjusted R-squared: 0.09893  F-statistic: 34.35 on 14 and 4238 DF, p-value: < 2.2e-16 | | | | |

| **Supplementary Table S9.** Baseline Anxiety-COVID model | | | | |
| --- | --- | --- | --- | --- |
|  | Estimate | Std. Error | t value | Pr(>|t|) |
| (Intercept) | 10.23954 | 0.33371 | 30.684 | < 2e-16*** |
| ptmAltruismZ | -0.03847 | 0.07664 | -0.502 | 0.61571 |
| ptmAnynomousZ | -0.07462 | 0.06726 | -1.109 | 0.26730 |
| ptmCompliantZ | -0.22863 | 0.08287 | -2.759 | 0.00583** |
| ptmDireZ | 0.10910 | 0.09190 | 1.187 | 0.23523 |
| ptmEmotionZ | 0.49823 | 0.08252 | 6.038 | 1.70e-09*** |
| ptmPublicZ | 0.10924 | 0.07635 | 1.431 | 0.15257 |
| AUDITZ | -0.15261 | 0.06561 | -2.326 | 0.02006* |
| DUDITZ | 0.09458 | 0.06642 | 1.424 | 0.15451 |
| PHQ9Z | 3.49342 | 0.07536 | 46.355 | < 2e-16*** |
| ageZ | -0.40118 | 0.06654 | -6.030 | 1.78e-09*** |
| education | 0.16365 | 0.13262 | 1.234 | 0.21728 |
| gender | 0.84521 | 0.15268 | 5.536 | 3.28e-08*** |
| lonelinessZ | 0.45742 | 0.07335 | 6.236 | 4.92e-10*** |
| covidInfectZ | -0.08553 | 0.06280 | -1.362 | 0.17324 |
| Residual standard error: 4.108 on 4238 degrees of freedom  (231 observations deleted due to missingness)  Multiple R-squared: 0.4814, Adjusted R-squared: 0.4797  F-statistic: 281 on 14 and 4238 DF, p-value: < 2.2e-16 | | | | |

| **Supplementary Table S10.** Baseline Depression-COVID model | | | | |
| --- | --- | --- | --- | --- |
|  | Estimate | Std. Error | t value | Pr(>|t|) |
| (Intercept) | 17.149436 | 0.369269 | 46.442 | < 2e-16*** |
| ptmAltruismZ | -0.013620 | 0.084793 | -0.161 | 0.872395 |
| ptmAnynomousZ | 0.248729 | 0.074322 | 3.347 | 0.000825*** |
| ptmCompliantZ | 0.163225 | 0.091729 | 1.779 | 0.075242. |
| ptmDireZ | 0.185629 | 0.101644 | 1.826 | 0.067882. |
| ptmEmotionZ | -0.140105 | 0.091659 | -1.529 | 0.126451 |
| ptmPublicZ | 0.005846 | 0.084488 | 0.069 | 0.944838 |
| AUDITZ | 0.054212 | 0.072623 | 0.746 | 0.455418 |
| DUDITZ | 0.365322 | 0.073280 | 4.985 | 6.43e-07*** |
| GAD7Z | 3.655101 | 0.078850 | 46.355 | < 2e-16*** |
| ageZ | -0.026814 | 0.073922 | -0.363 | 0.716819 |
| education | -1.081019 | 0.145802 | -7.414 | 1.47e-13*** |
| gender | -0.098495 | 0.169512 | -0.581 | 0.561240 |
| lonelinessZ | 1.841888 | 0.076447 | 24.094 | < 2e-16*** |
| covidInfectZ | 0.253933 | 0.069376 | 3.660 | 0.000255*** |
| Residual standard error: 4.545 on 4238 degrees of freedom  (231 observations deleted due to missingness)  Multiple R-squared: 0.5388, Adjusted R-squared: 0.5373  F-statistic: 353.6 on 14 and 4238 DF, p-value: < 2.2e-16 | | | | |

## Baseline analyses: Effect sizes

We calculated effect sizes of prosocial behavior subtypes (PB) on psychiatric symptoms based on the baseline regression models included in the main analyses. Effect sizes were estimated from the *t*-statistics of each predictor by first deriving the partial correlation coefficient (*r*), which reflects the unique association between each PB subtype and the outcome while controlling for the other predictors. Confidence intervals for *r* were obtained using Fisher’s *z* transformation. To facilitate interpretation, *r* values were converted to Cohen’s *d* equivalents.

Effect sizes were interpreted using conventional benchmarks 5

- *r* < 0.10 (≈ *d* < 0.20) – Very small effect
- 0.10 ≤ *r* < 0.30 (≈ *d* < 0.50) – Small effect
- 0.30 ≤ *r* < 0.50 (≈ *d* < 0.80) – Moderate effect
- *r* ≥ 0.50 (≈ *d* ≥ 0.80) – Large effect

Next, to evaluate whether these effects were clinically meaningful, we compared them to effect sizes from other relevant and partly independent predictors: anxiety and depression symptoms (in the substance use models), alcohol and substance use (in the anxiety and depression models).

**Note on effect size calculation.**
In a previous version of this manuscript (available as a preprint), effect sizes were reported as unique adjusted R² values for each predictor, reflecting the proportion of variance in the outcome explained above and beyond the other predictors. In the present version, we instead report partial correlations (r) and their Cohen’s d equivalents, derived from the t-statistics of the regression coefficients. Partial correlations are more standard effect size indices in regression contexts, directly quantify the unique strength of association between each predictor and the outcome, and allow for conversion into widely interpretable effect size metrics (Cohen’s d). Both approaches capture the unique contribution of predictors, but they are expressed on different scales (variance explained vs. association strength) and are therefore not directly comparable in magnitude. Nonetheless, the relative pattern of results across predictors remains consistent between the two approaches.

| **Supplementary Table S11.** Baseline Alcohol use and PB: Effect sizes | | | | | |
| --- | --- | --- | --- | --- | --- |
| **Predictor** | **t** | **r** | **r 95% CI** | **d** | **d 95% CI** |
| ptmAltruismZ | -3.238 | 0.050 | [0.02, 0.08] | 0.099 | [0.039, 0.16] |
| ptmAnynomousZ | -2.378 | 0.036 | [0.006, 0.066] | 0.073 | [0.013, 0.133] |
| ptmCompliantZ | 1.070 | 0.016 | [-0.014, 0.046] | 0.033 | [-0.027, 0.093] |
| ptmDireZ | 1.647 | 0.025 | [-0.005, 0.055] | 0.051 | [-0.01, 0.111] |
| ptmEmotionZ | 1.069 | 0.016 | [-0.014, 0.046] | 0.033 | [-0.027, 0.093] |
| ptmPublicZ | 1.056 | 0.016 | [-0.014, 0.046] | 0.032 | [-0.028, 0.093] |
| ageZ | -5.199 | 0.080 | [0.05, 0.109] | 0.160 | [0.099, 0.22] |
| education | 0.986 | 0.015 | [-0.015, 0.045] | 0.030 | [-0.03, 0.091] |
| gender | -9.117 | 0.139 | [0.109, 0.168] | 0.280 | [0.219, 0.341] |
| Note. t = test statistic; r = partial correlation coefficient; d = Cohen’s d equivalent effect size.  Confidence intervals (95% CI) are based on Fisher’s z transformation for r and back-transformed for d. | | | | | |

| **Supplementary Table S12.** Baseline Alcohol use and PB including clinical co-variates: Effect sizes | | | | | |
| --- | --- | --- | --- | --- | --- |
| **Predictor** | **t** | **r** | **r (95% CI)** | **d** | **d (95% CI)** |
| ptmAltruismZ | -3.258 | 0.050 | [0.02, 0.08] | 0.100 | [0.04, 0.16] |
| ptmAnynomousZ | -2.373 | 0.036 | [0.006, 0.066] | 0.073 | [0.013, 0.133] |
| ptmCompliantZ | 0.975 | 0.015 | [-0.015, 0.045] | 0.030 | [-0.03, 0.09] |
| ptmDireZ | 1.668 | 0.026 | [-0.004, 0.056] | 0.051 | [-0.009, 0.111] |
| ptmEmotionZ | 1.297 | 0.020 | [-0.01, 0.05] | 0.040 | [-0.02, 0.1] |
| ptmPublicZ | 1.113 | 0.017 | [-0.013, 0.047] | 0.034 | [-0.026, 0.094] |
| ageZ | -5.380 | 0.082 | [0.052, 0.112] | 0.165 | [0.105, 0.226] |
| education | 0.954 | 0.015 | [-0.015, 0.045] | 0.029 | [-0.031, 0.09] |
| gender | -8.887 | 0.135 | [0.106, 0.165] | 0.273 | [0.212, 0.334] |
| GAD7_t1Z | -2.228 | 0.034 | [0.004, 0.064] | 0.068 | [0.008, 0.129] |
| PHQ9_t1Z | 1.257 | 0.019 | [-0.011, 0.049] | 0.039 | [-0.022, 0.099] |
| Confidence intervals (95% CI) are based on Fisher’s z transformation for r and back-transformed for d.  **Abbreviations:** t = test statistic; r = partial correlation coefficient; d = Cohen’s d equivalent effect size; *GAD7* = Generalized Anxiety Disorder Scale-7; *PHQ-9* = Patient Health Questionnaire-9 | | | | | |

| **Supplementary Table S13.** Baseline Substance use and PB: Effect sizes | | | | | | | |
| --- | --- | --- | --- | --- | --- | --- | --- |
| **Predictor** | **t** | **r** | **r (95% CI)** | **d** | **d (95% CI)** |
| ptmAltruismZ | -1.321 | 0.020 | [-0.01, 0.05] | 0.041 | [-0.02, 0.101] |
| ptmAnynomousZ | -0.082 | 0.001 | [-0.029, 0.031] | 0.003 | [-0.058, 0.063] |
| ptmCompliantZ | -1.616 | 0.025 | [-0.005, 0.055] | 0.050 | [-0.011, 0.11] |
| ptmDireZ | 1.065 | 0.016 | [-0.014, 0.046] | 0.033 | [-0.027, 0.093] |
| ptmEmotionZ | 3.343 | 0.051 | [0.021, 0.081] | 0.103 | [0.042, 0.163] |
| ptmPublicZ | 2.108 | 0.032 | [0.002, 0.062] | 0.065 | [0.005, 0.125] |
| ageZ | -3.671 | 0.056 | [0.026, 0.086] | 0.113 | [0.052, 0.173] |
| education | -5.964 | 0.091 | [0.061, 0.121] | 0.183 | [0.123, 0.244] |
| gender | -9.519 | 0.145 | [0.115, 0.174] | 0.292 | [0.232, 0.353] |
| Confidence intervals (95% CI) are based on Fisher’s z transformation for r and back-transformed for d.  **Abbreviations:** t = test statistic; r = partial correlation coefficient; d = Cohen’s d equivalent effect size. | | | | | |

| **Supplementary Table S14.** Baseline Substance use and PB, including clinical co-variates: Effect sizes | | | | | |
| --- | --- | --- | --- | --- | --- |
| **Predictor** | **t** | **r** | **r (95% CI)** | **d** | **d (95% CI)** |
| ptmAltruismZ | -1.227 | 0.019 | [-0.011, 0.049] | 0.038 | [-0.023, 0.098] |
| ptmAnynomousZ | -0.698 | 0.011 | [-0.019, 0.041] | 0.021 | [-0.039, 0.082] |
| ptmCompliantZ | -1.621 | 0.025 | [-0.005, 0.055] | 0.050 | [-0.01, 0.11] |
| ptmDireZ | 1.007 | 0.015 | [-0.015, 0.046] | 0.031 | [-0.029, 0.091] |
| ptmEmotionZ | 2.708 | 0.042 | [0.011, 0.072] | 0.083 | [0.023, 0.143] |
| ptmPublicZ | 1.890 | 0.029 | [-0.001, 0.059] | 0.058 | [-0.002, 0.118] |
| ageZ | -3.189 | 0.049 | [0.019, 0.079] | 0.098 | [0.038, 0.158] |
| education | -4.611 | 0.071 | [0.041, 0.101] | 0.142 | [0.081, 0.202] |
| gender | -9.744 | 0.148 | [0.118, 0.177] | 0.299 | [0.239, 0.36] |
| GAD7_t1Z | 0.837 | 0.013 | [-0.017, 0.043] | 0.026 | [-0.035, 0.086] |
| PHQ9_t1Z | 5.268 | 0.081 | [0.051, 0.11] | 0.162 | [0.101, 0.222] |
| Confidence intervals (95% CI) are based on Fisher’s z transformation for r and back-transformed for d.  **Abbreviations:** t = test statistic; r = partial correlation coefficient; d = Cohen’s d equivalent effect size; *GAD7* = Generalized Anxiety Disorder Scale-7; *PHQ-9* = Patient Health Questionnaire-9 | | | | | |

| **Supplementary Table S15.** Baseline Anxiety and PB: Effect sizes | | | | | | |
| --- | --- | --- | --- | --- | --- | --- |
| **Predictor** | **t** | **r** | **r (95% CI)** | **d** | **d (95% CI)** |
| ptmAltruismZ | -0.886 | 0.014 | [-0.016, 0.044] | 0.027 | [-0.033, 0.087] |
| ptmAnynomousZ | 2.915 | 0.045 | [0.015, 0.075] | 0.089 | [0.029, 0.15] |
| ptmCompliantZ | -1.925 | 0.030 | [-0.001, 0.06] | 0.059 | [-0.001, 0.119] |
| ptmDireZ | 0.744 | 0.011 | [-0.019, 0.041] | 0.023 | [-0.037, 0.083] |
| ptmEmotionZ | 7.827 | 0.119 | [0.09, 0.149] | 0.240 | [0.18, 0.301] |
| ptmPublicZ | 2.256 | 0.035 | [0.005, 0.065] | 0.069 | [0.009, 0.13] |
| ageZ | -6.521 | 0.100 | [0.07, 0.129] | 0.200 | [0.14, 0.261] |
| education | -6.752 | 0.103 | [0.073, 0.133] | 0.207 | [0.147, 0.268] |
| gender | 4.954 | 0.076 | [0.046, 0.106] | 0.152 | [0.092, 0.213] |
| **Abbreviations:** t = test statistic; r = partial correlation coefficient; d = Cohen’s d equivalent effect size. Confidence intervals (95% CI) are based on Fisher’s z transformation for r and back-transformed for d. | | | | | |

| **Supplementary Table S16.** Baseline Anxiety and PB including clinical co-variates: Effect sizes | | | | | |
| --- | --- | --- | --- | --- | --- |
| **Predictor** | **t** | **r** | **r (95% CI)** | **d** | **d (95% CI)** |
| ptmAltruismZ | -0.918 | 0.014 | [-0.016, 0.044] | 0.028 | [-0.032, 0.088] |
| ptmAnynomousZ | 2.818 | 0.043 | [0.013, 0.073] | 0.087 | [0.026, 0.147] |
| ptmCompliantZ | -1.721 | 0.026 | [-0.004, 0.056] | 0.053 | [-0.007, 0.113] |
| ptmDireZ | 0.723 | 0.011 | [-0.019, 0.041] | 0.022 | [-0.038, 0.082] |
| ptmEmotionZ | 7.579 | 0.116 | [0.086, 0.145] | 0.233 | [0.172, 0.293] |
| ptmPublicZ | 2.110 | 0.032 | [0.002, 0.062] | 0.065 | [0.005, 0.125] |
| ageZ | -6.422 | 0.098 | [0.068, 0.128] | 0.197 | [0.137, 0.258] |
| education | -6.120 | 0.094 | [0.064, 0.123] | 0.188 | [0.128, 0.249] |
| gender | 5.374 | 0.082 | [0.052, 0.112] | 0.165 | [0.105, 0.226] |
| AUDIT_t1Z | -3.138 | 0.048 | [0.018, 0.078] | 0.096 | [0.036, 0.157] |
| DUDIT_t1Z | 6.262 | 0.096 | [0.066, 0.125] | 0.192 | [0.132, 0.253] |
| **Abbreviations:** t = test statistic; r = partial correlation coefficient; d = Cohen’s d equivalent effect size; *AUDIT* = Alcohol Use Disorder Identification Test; *DUDIT* = Drug Use Disorder Identification Test  Confidence intervals (95% CI) are based on Fisher’s z transformation for r and back-transformed for d. | | | | | |

| **Supplementary Table S17.** Baseline Depression and PB: Effect sizes | | | | | | |
| --- | --- | --- | --- | --- | --- | --- |
| **Predictor** | **t** | **r** | **r (95% CI)** | **d** | **d (95% CI)** |
| ptmAltruismZ | -0.820 | 0.013 | [-0.018, 0.043] | 0.025 | [-0.035, 0.085] |
| ptmAnynomousZ | 5.277 | 0.081 | [0.051, 0.111] | 0.162 | [0.102, 0.222] |
| ptmCompliantZ | 0.268 | 0.004 | [-0.026, 0.034] | 0.008 | [-0.052, 0.068] |
| ptmDireZ | 0.493 | 0.008 | [-0.023, 0.038] | 0.015 | [-0.045, 0.075] |
| ptmEmotionZ | 4.681 | 0.072 | [0.042, 0.102] | 0.144 | [0.083, 0.204] |
| ptmPublicZ | 1.795 | 0.028 | [-0.003, 0.058] | 0.055 | [-0.005, 0.115] |
| ageZ | -3.525 | 0.054 | [0.024, 0.084] | 0.108 | [0.048, 0.169] |
| education | -11.236 | 0.170 | [0.141, 0.199] | 0.345 | [0.284, 0.406] |
| gender | 1.052 | 0.016 | [-0.014, 0.046] | 0.032 | [-0.028, 0.093] |
| **Abbreviations:** t = test statistic; r = partial correlation coefficient; d = Cohen’s d equivalent effect size. Confidence intervals (95% CI) are based on Fisher’s z transformation for r and back-transformed for d. | | | | | |

| **Supplementary Table S18.** Baseline Depression and PB including clinical co-variates: Effect sizes | | | | | |
| --- | --- | --- | --- | --- | --- |
| **Predictor** | **t** | **r** | **r (95% CI)** | **d** | **d (95% CI)** |
| ptmAltruismZ | -0.758 | 0.012 | [-0.018, 0.042] | 0.023 | [-0.037, 0.084] |
| ptmAnynomousZ | 5.249 | 0.080 | [0.05, 0.11] | 0.161 | [0.101, 0.222] |
| ptmCompliantZ | 0.505 | 0.008 | [-0.022, 0.038] | 0.016 | [-0.045, 0.076] |
| ptmDireZ | 0.413 | 0.006 | [-0.024, 0.036] | 0.013 | [-0.048, 0.073] |
| ptmEmotionZ | 4.323 | 0.066 | [0.036, 0.096] | 0.133 | [0.072, 0.193] |
| ptmPublicZ | 1.575 | 0.024 | [-0.006, 0.054] | 0.048 | [-0.012, 0.109] |
| ageZ | -3.236 | 0.050 | [0.02, 0.08] | 0.099 | [0.039, 0.16] |
| education | -10.489 | 0.159 | [0.13, 0.188] | 0.322 | [0.261, 0.383] |
| gender | 1.942 | 0.030 | [0, 0.06] | 0.060 | [-0.001, 0.12] |
| AUDIT_t1Z | -1.951 | 0.030 | [0, 0.06] | 0.060 | [0, 0.12] |
| DUDIT_t1Z | 7.989 | 0.122 | [0.092, 0.151] | 0.245 | [0.185, 0.306] |
| **Abbreviations:** t = test statistic; r = partial correlation coefficient; d = Cohen’s d equivalent effect size; *AUDIT* = Alcohol Use Disorder Identification Test; *DUDIT* = Drug Use Disorder Identification Test  Confidence intervals (95% CI) are based on Fisher’s z transformation for r and back-transformed for d. | | | | | |

## Baseline analyses: Exploratory models (ADHD; OCD; PTSD; Gambling)

An additional set of psychiatric symptom measures were assessed at baseline only for exploratory purposes: Attention Deficit Hyperactivity Disorder (using The Barkley Adult ADHD Rating Scale-IV6), Obsessive Compulsive Disorder (Obsessive-Compulsive Inventory-Revised 7), Posttraumatic Stress Disorder (The Posttraumatic Stress Disorder Checklist 8), and Problem Gambling (Problem Gambling Severity Index 9), Similarly, as for our main baseline models, we adjusted for demographics and the remaining psychiatric symptom scales.

| **Supplementary Table S19.** Baseline ADHD (BAARS) model | | | | |
| --- | --- | --- | --- | --- |
|  | Estimate | Std. Error | t value | Pr(>|t|) |
| (Intercept) | 18.4086 | 0.9142 | 20.136 | < 2e-16*** |
| ptmAltruismZ | -0.2622 | 0.2099 | -1.249 | 0.211718 |
| ptmAnynomousZ | 0.7913 | 0.1841 | 4.299 | 1.75e-05*** |
| ptmCompliantZ | -0.7846 | 0.2272 | -3.453 | 0.000559*** |
| ptmDireZ | 0.8619 | 0.2507 | 3.438 | 0.000591*** |
| ptmEmotionZ | 0.1988 | 0.2269 | 0.876 | 0.380900 |
| ptmPublicZ | 0.7377 | 0.2091 | 3.528 | 0.000424*** |
| AUDITZ | 0.6291 | 0.1797 | 3.500 | 0.000470*** |
| DUDITZ | 0.9157 | 0.1819 | 5.033 | 5.02e-07*** |
| GAD7Z | 3.7746 | 0.2385 | 15.826 | < 2e-16*** |
| PHQ9Z | 4.1561 | 0.2374 | 17.507 | < 2e-16*** |
| ageZ | -0.4840 | 0.1826 | -2.651 | 0.008057** |
| education | -0.7480 | 0.3630 | -2.061 | 0.039381* |
| gender | 0.3932 | 0.4175 | 0.942 | 0.346304 |
| Residual standard error: 11.25 on 4239 degrees of freedom  (231 observations deleted due to missingness)  Multiple R-squared: 0.336, Adjusted R-squared: 0.3339  F-statistic: 165 on 13 and 4239 DF, p-value: < 2.2e-16 | | | | |

| **Supplementary Table S20.** Baseline OCD model | | | | |
| --- | --- | --- | --- | --- |
|  | Estimate | Std. Error | t value | Pr(>|t|) |
| (Intercept) | 12.2445 | 1.0243 | 11.954 | < 2e-16*** |
| ptmAltruismZ | -0.9097 | 0.2352 | -3.868 | 0.000111*** |
| ptmAnynomousZ | 0.5500 | 0.2062 | 2.667 | 0.007685** |
| ptmCompliantZ | -0.2364 | 0.2545 | -0.929 | 0.353034 |
| ptmDireZ | -0.3970 | 0.2809 | -1.414 | 0.157569 |
| ptmEmotionZ | 0.5586 | 0.2542 | 2.197 | 0.028055* |
| ptmPublicZ | 0.6368 | 0.2343 | 2.718 | 0.006595** |
| AUDITZ | 0.4021 | 0.2014 | 1.997 | 0.045915* |
| DUDITZ | 0.7276 | 0.2038 | 3.569 | 0.000362*** |
| GAD7Z | 4.1267 | 0.2672 | 15.443 | < 2e-16*** |
| PHQ9Z | 1.1430 | 0.2660 | 4.297 | 1.77e-05*** |
| ageZ | -1.0388 | 0.2046 | -5.078 | 3.97e-07*** |
| education | -2.3080 | 0.4066 | -5.676 | 1.47e-08*** |
| gender | 0.3835 | 0.4677 | 0.820 | 0.412236 |
| Residual standard error: 12.61 on 4239 degrees of freedom  (231 observations deleted due to missingness)  Multiple R-squared: 0.1941, Adjusted R-squared: 0.1916  F-statistic: 78.52 on 13 and 4239 DF, p-value: < 2.2e-16 | | | | |

| **Supplementary Table S21.** Baseline PTSD (PCL-5) model | | | | |
| --- | --- | --- | --- | --- |
|  | Estimate | Std. Error | t value | Pr(>|t|) |
| (Intercept) | 19.07277 | 1.55693 | 12.250 | < 2e-16*** |
| ptmAltruismZ | -0.03770 | 0.35746 | -0.105 | 0.91601 |
| ptmAnynomousZ | 1.28381 | 0.31346 | 4.096 | 4.29e-05*** |
| ptmCompliantZ | -1.02857 | 0.38689 | -2.659 | 0.00788** |
| ptmDireZ | 2.63843 | 0.42689 | 6.181 | 6.98e-10*** |
| ptmEmotionZ | 0.98366 | 0.38641 | 2.546 | 0.01094* |
| ptmPublicZ | 0.08221 | 0.35613 | 0.231 | 0.81745 |
| AUDITZ | -0.32181 | 0.30608 | -1.051 | 0.29314 |
| DUDITZ | 2.35714 | 0.30982 | 7.608 | 3.41e-14*** |
| GAD7Z | 3.84197 | 0.40621 | 9.458 | < 2e-16*** |
| PHQ9Z | 6.60629 | 0.40426 | 16.342 | < 2e-16*** |
| ageZ | 2.14697 | 0.31103 | 6.903 | 5.86e-12*** |
| education | -1.89136 | 0.61810 | -3.060 | 0.00223** |
| gender | 3.30673 | 0.71095 | 4.651 | 3.40e-06*** |
| Residual standard error: 19.16 on 4238 degrees of freedom  (232 observations deleted due to missingness)  Multiple R-squared: 0.2629, Adjusted R-squared: 0.2607  F-statistic: 116.3 on 13 and 4238 DF, p-value: < 2.2e-16 | | | | |

| **Supplementary Table S22.** Baseline Problem Gambling model | | | | |
| --- | --- | --- | --- | --- |
|  | Estimate | Std. Error | t value | Pr(>|t|) |
| (Intercept) | 1.045976 | 0.154174 | 6.784 | 1.33e-11*** |
| ptmAltruismZ | -0.036203 | 0.035399 | -1.023 | 0.306504 |
| ptmAnynomousZ | -0.002667 | 0.031042 | -0.086 | 0.931544 |
| ptmCompliantZ | 0.010736 | 0.038313 | 0.280 | 0.779316 |
| ptmDireZ | 0.106924 | 0.042274 | 2.529 | 0.011465* |
| ptmEmotionZ | -0.052763 | 0.038263 | -1.379 | 0.167983 |
| ptmPublicZ | 0.074167 | 0.035267 | 2.103 | 0.035522* |
| AUDITZ | 0.089621 | 0.030310 | 2.957 | 0.003126** |
| DUDITZ | 0.047167 | 0.030681 | 1.537 | 0.124289 |
| GAD7Z | 0.162062 | 0.040222 | 4.029 | 5.69e-05*** |
| PHQ9Z | 0.032413 | 0.040034 | 0.810 | 0.418187 |
| ageZ | 0.135560 | 0.030790 | 4.403 | 1.10e-05*** |
| education | -0.217270 | 0.061209 | -3.550 | 0.000390*** |
| gender | -0.250582 | 0.070400 | -3.559 | 0.000376*** |
| Residual standard error: 1.898 on 4239 degrees of freedom  (231 observations deleted due to missingness)  Multiple R-squared: 0.03051, Adjusted R-squared: 0.02753  F-statistic: 10.26 on 13 and 4239 DF, p-value: < 2.2e-16 | | | | |

## Longitudinal analyses: Main models

One latent class mixed model was estimated per psychiatric measure, differing in the number of latent classes included. Classes were added to the model, based on that the percentage of participants per class remained at least 10% of the sample. In other words, models in which one class included less than 10% of participants were not considered, and no more classes were added.

The final model selection (in bold) was based on the Bayesian Information Criterion (BIC).

Alcohol use models:

| **Supplementary Table S23.** Alcohol use model selection | | | | | | | |
| --- | --- | --- | --- | --- | --- | --- | --- |
|  | G | loglik | npm | BIC | %class1 | %class2 | %class3 |
| gmm1 | 1 | -20483.31 | 8 | 41031.37 | 100.00000 |  |  |
| **gmm2** | **2** | **-19994.43** | **16** | **40118.35** | **31.94742** | **68.052583** |  |
| gmm3 | 3 | -19701.34 | 24 | 39596.91 | 32.19199 | 3.668603 | 64.13941 |

| **Supplementary Table S24.** Substance use model selection | | | | | | | |
| --- | --- | --- | --- | --- | --- | --- | --- |
|  | G | loglik | npm | BIC | %class1 | %class2 | %class3 |
| gmm1 | 1 | -18195.67 | 8 | 36455.44 | 100.00000 |  |  |
| **gmm2** | **2** | **-15341.01** | **16** | **30810.19** | **86.82814** | **13.17186** |  |
| gmm3 | 3 | -14417.97 | 24 | 29028.21 | 84.83743 | 9.52223 | 5.640345 |

| **Supplementary Table S25.** Anxiety model selection | | | | | | | |
| --- | --- | --- | --- | --- | --- | --- | --- |
|  | G | loglik | npm | BIC | %class1 | %class2 | %class3 |
| gmm1 | 1 | -65908.74 | 15 | 131939.8 | 100.00000 |  |  |
| gmm2 | 2 | -65525.46 | 30 | 131295.5 | 10.39747 | 89.60253 |  |
| **gmm3** | **3** | **-65310.79** | **45** | **130988.5** | **49.71198** | **11.29032** | **38.9977** |

| **Supplementary Table S26.** Depression model selection | | | | | | | |
| --- | --- | --- | --- | --- | --- | --- | --- |
|  | G | loglik | npm | BIC | %class1 | %class2 | %class3 |
| gmm1 | 1 | -69366.54 | 15 | 138855.4 | 100.00000 |  |  |
| **gmm2** | **2** | **-68967.46** | **30** | **138179.6** | **87.44253** | **12.55747** |  |
| gmm3 | 3 | -68773.40 | 45 | 137913.8 | 10.22989 | 85.11494 | 4.655172 |

Following classifying individuals into different classes for each psychiatric domain, we applied a logistic regression model with the classification variable as a dependent variable and adding the six prosocial subtypes, demographic variables and the other psychiatric symptom classes as independent variables.

For the Alcohol, Substance use, and Depression models, we used a binary logistic regression model, given that these models had two latent classes (reference level = class 2/low symptom class). For the anxiety model, we used a multinomial logistic regression model, given that it had three latent classes (reference level = class 3/low symptom class).

*Generic logistic regression model specification:*

*classVariable1 ~ ptmAltruismZ + ptmAnynomousZ + ptmCompliantZ+ ptmDireZ + ptmEmotionZ+ ptmPublicZ + classVariable2Z + classVariable3Z + classVariable4Z + ageZ + education + gender*

| **Supplementary Table S27.** Longitudinal Alcohol use-model | | | |
| --- | --- | --- | --- |
| **Predictor** | **OR** | **95% CI** | **p** |
| ptmAltruismZ | 0.96 | 0.86–1.07 | .433 |
| ptmAnynomousZ | 0.89 | 0.82–0.98 | .013 |
| ptmCompliantZ | 1.05 | 0.94–1.17 | .386 |
| ptmDireZ | 0.94 | 0.83–1.06 | .322 |
| ptmEmotionZ | 1.09 | 0.98–1.22 | .131 |
| ptmPublicZ | 0.99 | 0.89–1.1 | .837 |
| class_SUDZ | 0.65 | 0.58–0.72 | <.001 |
| class_GADZ | 1.22 | 1.12–1.33 | <.001 |
| class_PHQZ | 1.03 | 0.95–1.12 | .420 |
| ageZ | 0.83 | 0.76–0.9 | <.001 |
| education | 1.63 | 1.37–1.94 | <.001 |
| gender | 1.02 | 0.82–1.25 | .889 |
| Note. For binary logistic regression, each row compares the the reference class (= Class 2/Low symptom class). OR = odds ratio. CI = confidence interval.  N = 2663; AIC = 3196.1. | | | |

| **Supplementary Table S28.** Longitudinal Substance use-model | | | |
| --- | --- | --- | --- |
| **Predictor** | **OR** | **95% CI** | **p** |
| ptmAltruismZ | 1.00 | 0.88–1.15 | .963 |
| ptmAnynomousZ | 1.01 | 0.89–1.14 | .925 |
| ptmCompliantZ | 0.93 | 0.8–1.09 | .387 |
| ptmDireZ | 1.06 | 0.89–1.26 | .500 |
| ptmEmotionZ | 1.06 | 0.91–1.23 | .458 |
| ptmPublicZ | 1.15 | 1.01–1.31 | .036 |
| class_AUDZ | 0.55 | 0.47–0.63 | <.001 |
| class_GADZ | 0.78 | 0.69–0.88 | <.001 |
| class_PHQZ | 1.00 | 0.89–1.11 | .969 |
| ageZ | 1.00 | 0.89–1.13 | .978 |
| education | 0.63 | 0.5–0.8 | <.001 |
| gender | 0.52 | 0.4–0.68 | <.001 |
| Note. For binary logistic regression, each row compares the the reference class (= Class 2/Low symptom class). OR = odds ratio. CI = confidence interval.  N = 2663; AIC = 1960.6. | | | |

| **Supplementary Table S29.** Longitudinal Anxiety-model | | | | |
| --- | --- | --- | --- | --- |
| **Class** | **Predictor** | **OR** | **95% CI** | **p** |
| 1 | ptmAltruismZ | 1.00 | 0.9–1.12 | .987 |
| 1 | ptmAnynomousZ | 1.09 | 0.99–1.19 | .070 |
| 1 | ptmCompliantZ | 0.94 | 0.84–1.05 | .271 |
| 1 | ptmDireZ | 1.08 | 0.96–1.23 | .205 |
| 1 | ptmEmotionZ | 1.25 | 1.12–1.4 | <.001 |
| 1 | ptmPublicZ | 1.10 | 0.99–1.22 | .089 |
| 1 | class_AUDZ | 1.22 | 1.12–1.33 | <.001 |
| 1 | class_SUDZ | 0.84 | 0.77–0.92 | <.001 |
| 1 | class_PHQZ | 0.74 | 0.67–0.82 | <.001 |
| 1 | ageZ | 0.79 | 0.73–0.87 | <.001 |
| 1 | education | 0.67 | 0.56–0.81 | <.001 |
| 1 | gender | 1.29 | 1.04–1.59 | .019 |
| 2 | ptmAltruismZ | 1.04 | 0.88–1.23 | .629 |
| 2 | ptmAnynomousZ | 1.05 | 0.91–1.2 | .515 |
| 2 | ptmCompliantZ | 1.05 | 0.88–1.24 | .589 |
| 2 | ptmDireZ | 0.87 | 0.73–1.05 | .150 |
| 2 | ptmEmotionZ | 1.22 | 1.04–1.45 | .017 |
| 2 | ptmPublicZ | 1.19 | 1.01–1.39 | .037 |
| 2 | class_AUDZ | 1.04 | 0.91–1.19 | .575 |
| 2 | class_SUDZ | 0.89 | 0.78–1.02 | .090 |
| 2 | class_PHQZ | 1.85 | 1.69–2.03 | <.001 |
| 2 | ageZ | 0.84 | 0.74–0.96 | .008 |
| 2 | education | 0.83 | 0.63–1.08 | .166 |
| 2 | gender | 1.50 | 1.08–2.09 | .016 |
| Note. For multinomial logistic regression, each row compares the indicated class with the reference class (= Class 3/Low symptom class). OR = odds ratio. CI = confidence interval.  N = 2663; AIC = 4831.3. | | | | |

| **Supplementary Table S30.** Longitudinal Depression-model | | | |
| --- | --- | --- | --- |
| **Predictor** | **OR** | **95% CI** | **p** |
| ptmAltruismZ | 1.02 | 0.89–1.17 | .746 |
| ptmAnynomousZ | 0.99 | 0.88–1.11 | .840 |
| ptmCompliantZ | 0.95 | 0.82–1.09 | .450 |
| ptmDireZ | 0.93 | 0.79–1.08 | .330 |
| ptmEmotionZ | 1.07 | 0.93–1.23 | .317 |
| ptmPublicZ | 1.09 | 0.94–1.25 | .259 |
| class_AUDZ | 1.04 | 0.93–1.17 | .447 |
| class_SUDZ | 1.00 | 0.89–1.11 | .969 |
| class_GADZ | 0.72 | 0.65–0.81 | <.001 |
| ageZ | 1.17 | 1.04–1.31 | .008 |
| education | 0.94 | 0.75–1.19 | .629 |
| gender | 0.93 | 0.7–1.22 | .598 |
| Note. For binary logistic regression, each row compares the the reference class (= Class 2/Symptom-improvement class). OR = odds ratio. CI = confidence interval.  N = 2663; AIC = 2223.8. | | | |

## Longitudinal analyses: Extended models

**Controlling for COVID-19-related variables: infection and subjective loneliness.**

| **Supplementary Table S31.** Longitudinal Alcohol use COVID-model | | | |
| --- | --- | --- | --- |
| **Predictor** | **OR** | **95% CI** | **p** |
| ptmAltruismZ | 0.96 | 0.86–1.07 | .440 |
| ptmAnynomousZ | 0.90 | 0.82–0.98 | .020 |
| ptmCompliantZ | 1.05 | 0.94–1.18 | .354 |
| ptmDireZ | 0.93 | 0.82–1.05 | .260 |
| ptmEmotionZ | 1.10 | 0.98–1.23 | .098 |
| ptmPublicZ | 0.99 | 0.9–1.11 | .920 |
| class_SUDZ | 0.65 | 0.58–0.72 | <.001 |
| class_GADZ | 1.18 | 1.08–1.29 | <.001 |
| class_PHQZ | 1.04 | 0.96–1.13 | .322 |
| ageZ | 0.83 | 0.77–0.91 | <.001 |
| education | 1.59 | 1.34–1.9 | <.001 |
| gender | 1.00 | 0.81–1.23 | .989 |
| lonelinessZ | 0.87 | 0.8–0.96 | .003 |
| covidInfectZ | 0.96 | 0.88–1.05 | .339 |
| Note. For binary logistic regression, each row compares the the reference class (= Class 2/Low symptom class). OR = odds ratio. CI = confidence interval.  N = 2663; AIC = 3190.6. | | | |

| **Supplementary Table S32.** Longitudinal Substance use COVID-model | | | |
| --- | --- | --- | --- |
| **Predictor** | **OR** | **95% CI** | **p** |
| ptmAltruismZ | 1.00 | 0.88–1.16 | .957 |
| ptmAnynomousZ | 1.00 | 0.89–1.14 | .945 |
| ptmCompliantZ | 0.93 | 0.8–1.09 | .384 |
| ptmDireZ | 1.06 | 0.9–1.26 | .484 |
| ptmEmotionZ | 1.06 | 0.91–1.23 | .472 |
| ptmPublicZ | 1.15 | 1.01–1.31 | .038 |
| class_AUDZ | 0.55 | 0.47–0.63 | <.001 |
| class_GADZ | 0.79 | 0.69–0.9 | <.001 |
| class_PHQZ | 1.00 | 0.89–1.11 | .946 |
| ageZ | 1.00 | 0.89–1.12 | .997 |
| education | 0.63 | 0.5–0.8 | <.001 |
| gender | 0.52 | 0.4–0.68 | <.001 |
| lonelinessZ | 1.03 | 0.91–1.17 | .608 |
| covidInfectZ | 1.00 | 0.88–1.12 | .977 |
| Note. For binary logistic regression, each row compares the the reference class (= Class 2/Low symptom class). OR = odds ratio. CI = confidence interval.  N = 2663; AIC = 1964.4. | | | |

| **Supplementary Table S33.** Longitudinal Anxiety COVID-model | | | | |
| --- | --- | --- | --- | --- |
| **Class** | **Predictor** | **OR** | **95% CI** | **p** |
| 1 | ptmAltruismZ | 1.01 | 0.9–1.13 | .897 |
| 1 | ptmAnynomousZ | 1.06 | 0.96–1.17 | .220 |
| 1 | ptmCompliantZ | 0.92 | 0.82–1.04 | .186 |
| 1 | ptmDireZ | 1.14 | 1.01–1.3 | .040 |
| 1 | ptmEmotionZ | 1.20 | 1.07–1.35 | .002 |
| 1 | ptmPublicZ | 1.08 | 0.97–1.21 | .157 |
| 1 | class_AUDZ | 1.18 | 1.08–1.29 | <.001 |
| 1 | class_SUDZ | 0.85 | 0.77–0.93 | <.001 |
| 1 | class_PHQZ | 0.73 | 0.66–0.81 | <.001 |
| 1 | ageZ | 0.77 | 0.71–0.85 | <.001 |
| 1 | education | 0.75 | 0.62–0.9 | .002 |
| 1 | gender | 1.36 | 1.09–1.69 | .006 |
| 1 | uclalsZ | 1.82 | 1.66–1.99 | <.001 |
| 1 | covidInfectZ | 1.00 | 0.91–1.09 | .941 |
| 2 | ptmAltruismZ | 1.03 | 0.87–1.22 | .713 |
| 2 | ptmAnynomousZ | 1.03 | 0.89–1.19 | .687 |
| 2 | ptmCompliantZ | 1.03 | 0.86–1.22 | .767 |
| 2 | ptmDireZ | 0.94 | 0.78–1.13 | .504 |
| 2 | ptmEmotionZ | 1.17 | 0.99–1.39 | .064 |
| 2 | ptmPublicZ | 1.16 | 0.98–1.36 | .077 |
| 2 | class_AUDZ | 1.01 | 0.88–1.16 | .922 |
| 2 | class_SUDZ | 0.90 | 0.78–1.03 | .110 |
| 2 | class_PHQZ | 1.82 | 1.65–2 | <.001 |
| 2 | ageZ | 0.82 | 0.72–0.93 | .003 |
| 2 | education | 0.90 | 0.68–1.18 | .439 |
| 2 | gender | 1.59 | 1.14–2.23 | .007 |
| 2 | uclalsZ | 1.77 | 1.53–2.03 | <.001 |
| 2 | covidInfectZ | 1.00 | 0.87–1.14 | .977 |
| Note. OR = odds ratio. CI = confidence interval. For multinomial logistic regression, each row compares the indicated class with the reference class (= Class 3/Low symptom class).  N = 2663; AIC = 4643.1. | | | | |

| **Supplementary Table S34.** Longitudinal Depression COVID-model | | | | |
| --- | --- | --- | --- | --- |
| **Predictor** | **OR** | **95% CI** | **p** |
| ptmAltruismZ | 1.02 | 0.89–1.17 | .760 |
| ptmAnynomousZ | 0.99 | 0.88–1.12 | .914 |
| ptmCompliantZ | 0.95 | 0.83–1.1 | .521 |
| ptmDireZ | 0.91 | 0.78–1.06 | .234 |
| ptmEmotionZ | 1.09 | 0.95–1.25 | .236 |
| ptmPublicZ | 1.09 | 0.95–1.26 | .221 |
| class_SUDZ | 1.06 | 0.94–1.19 | .343 |
| class_GADZ | 1.00 | 0.89–1.11 | .965 |
| class_PHQZ | 0.69 | 0.61–0.77 | <.001 |
| ageZ | 1.18 | 1.05–1.32 | .005 |
| education | 0.92 | 0.73–1.15 | .468 |
| gender | 0.91 | 0.69–1.19 | .486 |
| lonelinessZ | 0.83 | 0.74–0.93 | .001 |
| covidInfectZ | 0.94 | 0.85–1.05 | .276 |
| Note. For binary logistic regression, each row compares the the reference class (= Class 2/symptom-improvement class). OR = odds ratio. CI = confidence interval.  N = 2663; AIC = 2216.3. | | | |

Longitudinal analyses: Trajectory Characteristics

|  | **Supplementary Table S35.** Associations between Participant Characteristics and Alcohol Use Trajectories | | |
| --- | --- | --- | --- |
| **Alcohol use trajectories** | **High symptom profile**  **(Class 1, N = 2103)** | **Low symptom profile**  **(Class 2, N = 989)** | **Test statistic (T-test, *P*)*** |
| Age, *mean (SD)* | 36.20 (12.58) | 37.86 (12.36) | 0.001 |
| Gender, *n male (%)* | 1618 (76.9) | 761 (76.9) | 1.000 |
| Education, Undergraduate degree or higher, *n (%)* | 1266 (60.2) | 515 (52.1) | <0.001 |
| Lifetime diagnosis |  |  |  |
| Alcohol or substance use disorder, *n (%)* | 0.07 (0.26) | 0.10 (0.30) | 0.016 |
| Anxiety disorder | 1454 (69.1) | 729 (73.7) | 0.010 |
| Depressive disorder | 1638 (77.9) | 785 (79.4) | 0.374 |
| Current psychiatric treatment, *n (%)* |  |  |  |
| Psychotherapy | 499 (23.7) | 239 (24.2) | 0.825 |
| Pharmacotherapy | 1047 (49.8) | 513 (51.9) | 0.297 |
| Psychiatric symptom load at baseline, *mean (SD)* |  |  |  |
| AUDIT | 10.18 (4.72) | 2.60 (3.85) | <0.001 |
| DUDIT | 1.51 (4.37) | 0.80 (3.46) | <0.001 |
| GAD-7 | 11.64 (5.63) | 12.24 (5.81) | 0.006 |
| PHQ-9 | 14.72 (6.54) | 15.67 (6.87) | <0.001 |
| Prosocial behavior (PB), m*ean (SD)* |  |  |  |
| Altruistic PB | 23.10 (2.41) | 23.27 (2.57) | 0.067 |
| Anonymous PB | 12.91 (4.46) | 13.35 (4.85) | 0.012 |
| Compliant PB | 7.45 (1.91) | 7.37 (2.02) | 0.328 |
| Dire PB | 10.42 (2.88) | 10.39 (3.02) | 0.768 |
| Emotional PB | 11.72 (3.46) | 11.46 (3.55) | 0.052 |
| Public PB | 5.62 (2.32) | 5.54 (2.26) | 0.381 |
|  |  |  |  |
| * The results are based on multiple t-tests to illustrate general group differences between classes.  **Abbreviations:** AUDIT = Alcohol Use Disorder Identification Test; DUDIT = Drug Use Disorder Identificaiton Test;  GAD-7 = Generalized Anxiety Disorder-7; PB = Prosocial Behavior, PHQ-9 = Patient Health Questionnaire-9 | | | |

| **Supplementary Table S36.** Associations between Participant Characteristics and Substance Use Trajectories | | | |
| --- | --- | --- | --- |
| **Alcohol use trajectories** | **High symptom profile**  **(Class 1, N = 376)** | **Low symptom profile**  **(Class 2, N = 2464)** | **Test statistic (T-test, *P*)*** |
| Age, *mean (SD)* | 36.34 (13.12) | 37.20 (12.49) | 0.215 |
| Gender, *n male (%)* | 253 (67.3) | 1948 (79.1) | <0.001 |
| Education, Undergraduate degree or higher, *n (%)* | 187 (49.7) | 1481 (60.1) | <0.001 |
| Lifetime diagnosis |  |  |  |
| Alcohol or substance use disorder, *n (%)* | 0.21 (0.41) | 0.06 (0.24) | <0.001 |
| Anxiety disorder | 280 (74.5) | 1720 (69.8) | 0.074 |
| Depressive disorder | 313 (83.2) | 1926 (78.2) | 0.029 |
| Current psychiatric treatment, *n (%)* |  |  |  |
| Psychotherapy | 86 (22.9) | 603 (24.5) | 0.542 |
| Pharmacotherapy | 199 (52.9) | 1241 (50.4) | 0.385 |
| Psychiatric symptom load at baseline, *mean (SD)* |  |  |  |
| AUDIT | 11.22 (6.62) | 7.23 (5.30) | <0.001 |
| DUDIT | 7.08 (7.86) | 0.42 (2.01) | <0.001 |
| GAD-7 | 12.29 (5.59) | 11.80 (5.80) | 0.120 |
| PHQ-9 | 16.50 (6.50) | 14.89 (6.68) | <0.001 |
| Prosocial behavior (PB), m*ean (SD)* |  |  |  |
| Altruistic PB | 22.85 (2.51) | 23.26 (2.36) | 0.002 |
| Anonymous PB | 13.19 (4.47) | 13.08 (4.61) | 0.670 |
| Compliant PB | 7.44 (1.88) | 7.43 (1.98) | 0.889 |
| Dire PB | 10.52 (2.88) | 10.43 (2.92) | 0.555 |
| Emotional PB | 12.03 (3.56) | 11.58 (3.45) | 0.019 |
| Public PB | 6.05 (2.61) | 5.50 (2.21) | <0.001 |
|  |  |  |  |
| * The results are based on multiple t-tests to illustrate general group differences between classes.  **Abbreviations:** AUDIT = Alcohol Use Disorder Identification Test; DUDIT = Drug Use Disorder Identificaiton Test;  GAD-7 = Generalized Anxiety Disorder-7; PB = Prosocial Behavior, PHQ-9 = Patient Health Questionnaire-9 | | | |

| **Supplementary Table S37.** Associations between Participant Characteristics and Anxiety Trajectories | | | | |
| --- | --- | --- | --- | --- |
| **Anxiety trajectories** | **High symptom profile**  **(Class 1, N = 1622)** | **Improved-symptom profile**  **(Class 2, N = 374)** | **Low symptom profile**  **(Class 3, N = 1282)** | **Test statistic (ANOVA / Chi-square, *P*)*** |
| Age, *mean (SD)* | 35.24 (11.91) | 35.90 (12.50) | 38.57 (12.88) | <0.001 |
| Gender, *n male (%)* | 1270 (78.3) | 302 (80.7) | 941 (73.4) | 0.001 |
| Education, Undergraduate degree or higher, *n (%)* | 822 (50.7) | 222 (59.4) | 821 (64.0) | <0.001 |
| Lifetime diagnosis |  |  |  |  |
| Alcohol or substance use disorder, *n (%)* | 150 (9.2) | 26 (7.0) | 91 (7.1) | 0.073 |
| Anxiety disorder | 1269 (78.2) | 270 (72.2) | 776 (60.5) | <0.001 |
| Depressive disorder | 1332 (82.1) | 298 (79.7) | 942 (73.5) | <0.001 |
| Current psychiatric treatment, *n (%)* |  |  |  |  |
| Psychotherapy | 0.55 (0.50) | 0.56 (0.50) | 0.43 (0.50) | <0.001 |
| Pharmacotherapy | 0.28 (0.45) | 0.28 (0.45) | 0.18 (0.38) | <0.001 |
| Psychiatric symptom load at baseline, *mean (SD)* |  |  |  |  |
| AUDIT | 7.71 (6.13) | 7.89 (5.48) | 7.84 (5.35) | 0.762 |
| DUDIT | 1.77 (5.00) | 1.21 (3.99) | 0.80 (2.68) | <0.001 |
| GAD-7 | 14.62 (4.63) | 14.41 (4.54) | 7.73 (4.67) | <0.001 |
| PHQ-9 | 17.87 (5.85) | 16.76 (5.90) | 11.17 (5.90) | <0.001 |
| Prosocial behavior (PB), m*ean (SD)* |  |  |  |  |
| Altruistic PB | 23.07 (2.65) | 23.20 (2.21) | 23.25 (2.29) | 0.133 |
| Anonymous PB | 13.24 (4.76) | 13.10 (4.42) | 12.75 (4.48) | 0.018 |
| Compliant PB | 7.49 (1.98) | 7.51 (1.97) | 7.32 (1.90) | 0.038 |
| Dire PB | 10.61 (2.93) | 10.36 (2.89) | 10.18 (2.91) | <0.001 |
| Emotional PB | 12.10 (3.45) | 11.74 (3.39) | 11.11 (3.49) | <0.001 |
| Public PB | 5.67 (2.42) | 5.64 (2.37) | 5.50 (2.17) | 0.127 |
|  |  |  |  |  |
| * The results are based on multiple ANOVA's (continous variables) or ChiSqaure (binary variables) to illustrate general group differences between classes.  **Abbreviations:** AUDIT = Alcohol Use Disorder Identification Test; DUDIT = Drug Use Disorder Identificaiton Test;  GAD-7 = Generalized Anxiety Disorder-7; PB = Prosocial Behavior, PHQ-9 = Patient Health Questionnaire-9 | | | | |

| **Supplementary Table S38** Associations between Participant Characteristics and Depression Trajectories | | | | |
| --- | --- | --- | --- | --- |
| **Depression trajectories** | **High symptom profile**  **(Class 1, N = 2876)** | **Symptom-improvement profile**  **(Class 2, N = 410)** | | **Test statistic (T-test, *P*)*** |
| Age, *mean (SD)* | 36.66 (12.40) | 36.18 (12.86) | 0.460 | |
| Gender, *n male (%)* | 2197 (76.4) | 323 (78.8) | 0.313 | |
| Education, Undergraduate degree or higher, *n (%)* | 1613 (56.1) | 253 (61.7) | 0.036 | |
| Lifetime diagnosis |  |  |  | |
| Alcohol or substance use disorder, *n (%)* | 242 (8.4) | 28 (6.8) | 0.319 | |
| Anxiety disorder | 2044 (71.1) | 276 (67.3) | 0.133 | |
| Depressive disorder | 2256 (78.4) | 320 (78.0) | 0.907 | |
| Current psychiatric treatment, *n (%)* |  |  |  | |
| Psychotherapy | 0.50 (0.50) | 0.55 (0.50) | 0.043 | |
| Pharmacotherapy | 0.24 (0.43) | 0.23 (0.42) | 0.501 | |
| Psychiatric symptom load at baseline, *mean (SD)* |  |  |  | |
| AUDIT | 7.77 (5.78) | 7.99 (5.64) | 0.470 | |
| DUDIT | 1.38 (4.24) | 0.94 (3.39) | 0.044 | |
| GAD-7 | 11.80 (5.77) | 12.67 (5.25) | 0.004 | |
| PHQ-9 | 14.97 (6.76) | 16.24 (5.99) | <0.001 | |
| Prosocial behavior (PB), m*ean (SD)* |  |  |  | |
| Altruistic PB | 23.13 (2.52) | 23.30 (2.12) | 0.190 | |
| Anonymous PB | 13.00 (4.63) | 13.20 (4.55) | 0.431 | |
| Compliant PB | 7.41 (1.95) | 7.54 (1.94) | 0.189 | |
| Dire PB | 10.39 (2.93) | 10.54 (2.87) | 0.349 | |
| Emotional PB | 11.69 (3.48) | 11.53 (3.54) | 0.375 | |
| Public PB | 5.64 (2.37) | 5.38 (1.95) | 0.039 | |
|  |  |  |  | |
| * The results are based on multiple t-tests to illustrate general group differences between classes.  **Abbreviations:** AUDIT = Alcohol Use Disorder Identification Test; DUDIT = Drug Use Disorder Identificaiton Test;  GAD-7 = Generalized Anxiety Disorder-7; PB = Prosocial Behavior, PHQ-9 = Patient Health Questionnaire-9 | | | | |

# Supplementary References

1. Rozental, A. *et al.* Mental health in individuals with self-reported psychiatric symptoms during the COVID-19 pandemic: Baseline data from a swedish longitudinal cohort study. *Front. Psychiatry* **13**, (2022).

2. Association, A. P. & others. *Diagnostic and Statistical Manual of Mental Disorders (DSM-5®)*. (American Psychiatric Pub, 2013).

3. Proust-Lima, C., Philipps, V. & Liquet, B. Estimation of extended mixed models using latent classes and latent processes: The R package lcmm. *J. Stat. Softw.* **78**, (2017).

4. Carlo, G. & Randall, B. A. *The Development of a Measure of Prosocial Behaviors for Late Adolescents*. *Journal of Youth and Adolescence* vol. 31 (2002).

5. Cohen, J. *Statistical Power Analysis for the Behavioral Sciences*. (routledge, 2013).

6. Barkley, R. A. *Barkley Adult ADHD Rating Scale-Iv (BAARS-IV)*. (Guilford Press, 2011).

7. Foa, E. B. *et al.* The obsessive-compulsive inventory: Development and validation of a short version. *Psychol. Assess.* **14**, 485–496 (2002).

8. Blevins, C. A., Weathers, F. W., Davis, M. T., Witte, T. K. & Domino, J. L. The Posttraumatic Stress Disorder Checklist for DSM-5 (PCL-5): Development and Initial Psychometric Evaluation. *J. Trauma. Stress* **28**, 489–498 (2015).

9. Miller, N. V., Currie, S. R., Hodgins, D. C. & Casey, D. Validation of the problem gambling severity index using confirmatory factor analysis and rasch modelling. *Int. J. Methods Psychiatr. Res.* **22**, 245–255 (2013).
